# Supplementary material
Source: MDPI journal article supplement (https://www.mdpi.com/2073-4344/11/11/1356)
Supplement: s1 [file s1]

# Trans Influence of Boryl Ligands in CO<sub>2</sub> Hydrogenation on Ruthenium Complexes: Theoretical Prediction of Highly Active Catalysts for CO<sub>2</sub> Reduction

Tian Liu, Zhangyong Liu, Lipeng Tang, Jun Li,\* and Zhuhong Yang

State Key Laboratory of Materials-Oriented Chemical Engineering, College of Chemical Engineering, Nanjing Tech University, Nanjing 211816, China

E-mail: [lijun@njtech.edu.cn](mailto:lijun@njtech.edu.cn)

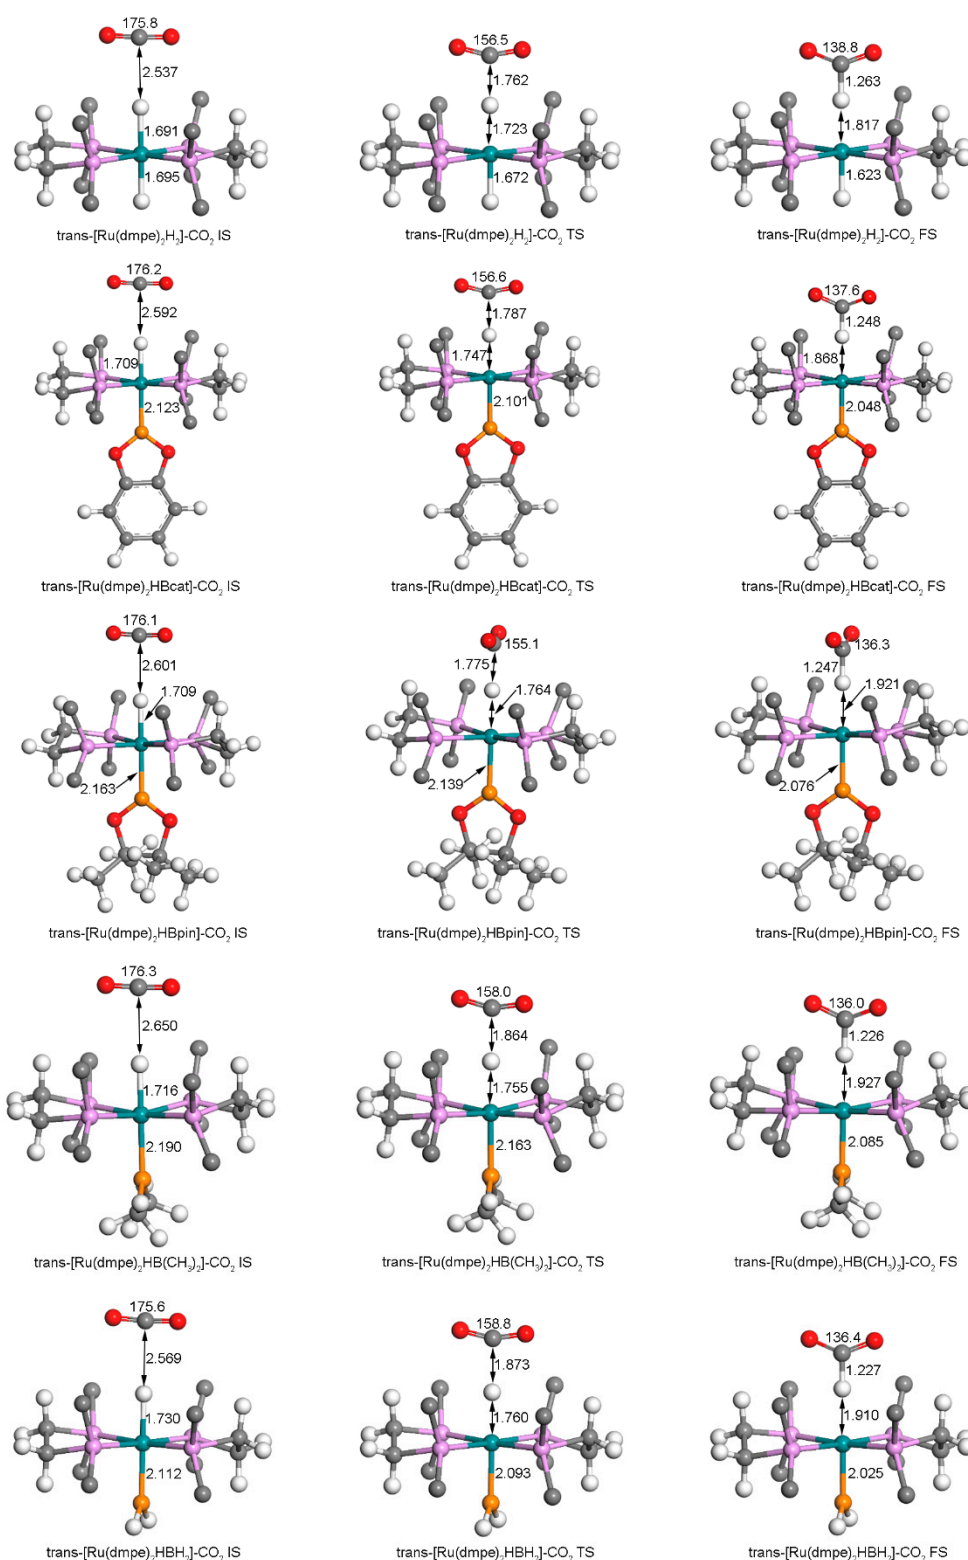

**Figure S1.** Optimized geometries of the species involved in the addition of hydride to CO<sub>2</sub> on trans-[Ru(dmpe)<sub>2</sub>HX] complexes (X may be hydride or B ligand). H atoms on the methyl groups are omitted. Bond distances are given in angstrom (Å) and bond angles are in degree (°). (Green balls: Ru; violet: P; red: O; blue: N; grey: C; orange: B; white: H)

**Table S1.** Cartesian coordinates for the optimized geometries of all the species

**Ru(PNP)(CO)<sub>2</sub>H<sub>2</sub>**

|    |             |             |             |
|----|-------------|-------------|-------------|
| Ru | 0.00014500  | -0.83570200 | -0.00005600 |
| P  | -2.27829800 | -0.50129000 | 0.06118800  |
| P  | 2.27848100  | -0.50056300 | -0.06103400 |
| N  | -0.00019800 | 1.34840300  | -0.00015300 |
| C  | -1.14035400 | 2.03641100  | -0.27645300 |
| C  | -1.16931800 | 3.43403100  | -0.26612400 |
| C  | -0.00076100 | 4.14476100  | -0.00002000 |
| C  | 1.16807900  | 3.43447300  | 0.26600500  |
| C  | 1.13967100  | 2.03683700  | 0.27620100  |
| H  | -2.10391800 | 3.95271000  | -0.48480900 |
| H  | -0.00098000 | 5.23677200  | 0.00002900  |
| H  | 2.10247500  | 3.95350300  | 0.48472800  |
| C  | -2.36182200 | 1.23346000  | -0.64653500 |
| C  | 2.36148500  | 1.23436900  | 0.64625400  |
| H  | -2.35406900 | 1.08347000  | -1.74104200 |
| H  | -3.28634200 | 1.77394500  | -0.38709200 |
| H  | 3.28576400  | 1.77511800  | 0.38649800  |
| H  | 2.35400800  | 1.08470900  | 1.74080800  |
| H  | -0.16031200 | -0.77294000 | -1.68830800 |
| C  | -3.46713800 | -1.42961100 | -1.00831900 |
| C  | -3.21709400 | -0.36848800 | 1.65454800  |
| C  | 3.21755500  | -0.36795300 | -1.65425000 |
| C  | 3.46726400  | -1.42841700 | 1.00893500  |
| H  | -3.06187400 | -1.47050300 | -2.02944500 |
| H  | -4.24810700 | -0.00733400 | 1.50532200  |
| H  | 4.24846100  | -0.00652700 | -1.50494700 |
| H  | 3.06170600  | -1.46926600 | 2.02994400  |
| C  | 0.00043900  | -2.67720500 | -0.00012200 |
| O  | 0.00066000  | -3.84334200 | -0.00019900 |
| H  | 3.24190500  | -1.36046000 | -2.13019400 |
| H  | 2.67240300  | 0.31225500  | -2.32512100 |
| H  | 4.46785200  | -0.96657600 | 1.01458000  |
| H  | 3.54944000  | -2.45893700 | 0.63020400  |
| H  | -3.54896400 | -2.46009800 | -0.62943000 |
| H  | -4.46782800 | -0.96799200 | -1.01374300 |
| H  | -3.24118300 | -1.36089000 | 2.13073300  |
| H  | -2.67196800 | 0.31198500  | 2.32516300  |
| H  | 0.16050500  | -0.77235700 | 1.68819600  |

Ru(PNP)(CO)HBr<sub>2</sub>

|    |             |             |             |
|----|-------------|-------------|-------------|
| Ru | -0.06841000 | 0.12047300  | -1.03249000 |
| P  | 0.68820400  | 2.30588700  | -0.80278800 |
| P  | -0.12609800 | -2.19897200 | -1.15097700 |
| N  | 1.81721500  | -0.32462300 | -0.00762300 |
| C  | 2.75290000  | 0.64640200  | 0.15761100  |
| C  | 3.94595600  | 0.40097300  | 0.84272000  |
| C  | 4.20800800  | -0.87655400 | 1.33135300  |
| C  | 3.26424600  | -1.87857500 | 1.12194800  |
| C  | 2.07062500  | -1.57461300 | 0.46190400  |
| H  | 4.66735300  | 1.20931200  | 0.96960600  |
| H  | 5.13824900  | -1.08972900 | 1.86188100  |
| H  | 3.43374100  | -2.89380900 | 1.48304400  |
| C  | 2.50529200  | 1.98521500  | -0.49272900 |
| C  | 1.00337200  | -2.62477700 | 0.27676400  |
| H  | 2.96256900  | 1.95925600  | -1.49826200 |
| H  | 2.99249700  | 2.79565600  | 0.07190300  |
| H  | 1.44917100  | -3.62854100 | 0.19127600  |
| H  | 0.35771800  | -2.62071700 | 1.17302200  |
| H  | 0.87895300  | 0.17595300  | -2.45592400 |
| C  | 0.70602900  | 3.46004600  | -2.24425500 |
| C  | 0.18085800  | 3.42395200  | 0.58080500  |
| C  | 0.63414300  | -3.05618700 | -2.60437800 |
| C  | -1.62942200 | -3.22104800 | -0.83334800 |
| H  | 1.10168100  | 2.92657500  | -3.11986900 |
| H  | 0.78303100  | 4.34671600  | 0.60033800  |
| H  | 0.70352600  | -4.14601500 | -2.45437200 |
| H  | -2.13650400 | -2.85257500 | 0.06959500  |
| C  | -1.57742100 | 0.47721700  | -2.03671500 |
| O  | -2.50521100 | 0.70171300  | -2.69798000 |
| H  | 0.02068100  | -2.84559600 | -3.49381400 |
| H  | 1.63376500  | -2.63188300 | -2.77707900 |
| H  | -1.37722600 | -4.28745900 | -0.72085700 |
| H  | -2.31852400 | -3.10156000 | -1.68352800 |
| H  | -0.32919800 | 3.76435200  | -2.46282300 |
| H  | 1.30820200  | 4.35971200  | -2.03965700 |
| H  | -0.88111000 | 3.68421100  | 0.45126200  |
| H  | 0.28453900  | 2.88460700  | 1.53345600  |
| B  | -1.16227700 | 0.11410500  | 0.77303400  |
| Br | -3.14853600 | 0.14530000  | 1.00742000  |
| Br | -0.31859600 | 0.08906700  | 2.63368800  |

Ru(PNP)(CO)HBCl<sub>2</sub>

|    |             |             |             |
|----|-------------|-------------|-------------|
| Ru | -0.50688900 | 0.25714300  | -0.60035300 |
| P  | 0.66762600  | 2.25694600  | -0.49850000 |
| P  | -1.02624400 | -1.99701800 | -0.76021900 |
| N  | 1.46662800  | -0.57889900 | -0.14686800 |
| C  | 2.57443600  | 0.20527100  | -0.21254100 |
| C  | 3.84063400  | -0.29233200 | 0.10706700  |
| C  | 3.98459800  | -1.63223100 | 0.45895400  |
| C  | 2.85156300  | -2.44125300 | 0.48535500  |
| C  | 1.60202300  | -1.88795900 | 0.19255800  |
| H  | 4.70553700  | 0.37065000  | 0.05777400  |
| H  | 4.96708600  | -2.04134400 | 0.70306500  |
| H  | 2.92141700  | -3.49693600 | 0.75095400  |
| C  | 2.41125100  | 1.61651100  | -0.72118200 |
| C  | 0.34903600  | -2.72346300 | 0.27969100  |
| H  | 2.56565200  | 1.59854200  | -1.81508100 |
| H  | 3.17319200  | 2.28423100  | -0.28901500 |
| H  | 0.56058300  | -3.77828900 | 0.04229400  |
| H  | -0.01966500 | -2.68165700 | 1.31997100  |
| H  | 0.02150700  | 0.26848300  | -2.23016100 |
| C  | 0.51087700  | 3.52453000  | -1.83292100 |
| C  | 0.76172200  | 3.30833300  | 1.02167100  |
| C  | -0.87267400 | -2.86485300 | -2.38793700 |
| C  | -2.54828600 | -2.76531900 | -0.05084800 |
| H  | 0.55806200  | 3.01846600  | -2.80749600 |
| H  | 1.50365500  | 4.11632300  | 0.91526500  |
| H  | -0.96674600 | -3.95851200 | -2.28744900 |
| H  | -2.70630900 | -2.38438400 | 0.96790100  |
| C  | -2.14177200 | 0.94221200  | -1.11643400 |
| O  | -3.16273100 | 1.37154900  | -1.46803100 |
| H  | -1.65998000 | -2.48800400 | -3.05874200 |
| H  | 0.09939200  | -2.60560100 | -2.83182500 |
| H  | -2.48070500 | -3.86488200 | -0.04004300 |
| H  | -3.41122000 | -2.46419400 | -0.66473500 |
| H  | -0.47405400 | 4.00803000  | -1.74184000 |
| H  | 1.29604900  | 4.29439500  | -1.76237700 |
| H  | -0.23097400 | 3.74742500  | 1.20642500  |
| H  | 1.01723500  | 2.67263500  | 1.88171300  |
| B  | -1.04810700 | 0.28272800  | 1.44717700  |
| Cl | -2.69868700 | 0.60834300  | 2.16567000  |
| Cl | 0.14446400  | -0.02593300 | 2.84465600  |

Ru(PNP)(CO)HB(OCH)<sub>2</sub>

|    |             |             |             |
|----|-------------|-------------|-------------|
| Ru | -0.25485300 | -0.42334900 | -0.71656700 |
| P  | -2.18659300 | 0.82787100  | -0.49990800 |
| P  | 1.96427600  | -1.05616900 | -0.82935000 |
| N  | 0.65812700  | 1.43176000  | 0.00902900  |
| C  | -0.06183600 | 2.58461900  | 0.04216000  |
| C  | 0.48811700  | 3.77544600  | 0.52476700  |
| C  | 1.81712300  | 3.79933000  | 0.94254000  |
| C  | 2.56055800  | 2.62367000  | 0.87280700  |
| C  | 1.95536500  | 1.44900000  | 0.41626200  |
| H  | -0.12396700 | 4.67824600  | 0.54779800  |
| H  | 2.26825500  | 4.72261300  | 1.31206100  |
| H  | 3.60503300  | 2.60066800  | 1.18695800  |
| C  | -1.45552800 | 2.55241800  | -0.53257500 |
| C  | 2.70686100  | 0.14316400  | 0.40162700  |
| H  | -1.38153400 | 2.79944100  | -1.60706500 |
| H  | -2.09954400 | 3.31016000  | -0.05823700 |
| H  | 3.78717000  | 0.30629000  | 0.26096200  |
| H  | 2.55069000  | -0.33986500 | 1.38170800  |
| H  | -0.17304900 | 0.28042700  | -2.27634400 |
| C  | -3.46613300 | 0.90268300  | -1.83132700 |
| C  | -3.23293800 | 0.81759100  | 1.03057000  |
| C  | 2.94258600  | -0.78651900 | -2.37995900 |
| C  | 2.61078800  | -2.68912600 | -0.25005100 |
| H  | -2.95781800 | 1.01517500  | -2.79934000 |
| H  | -4.02054900 | 1.58818100  | 1.00024600  |
| H  | 4.02278800  | -0.94766200 | -2.22920600 |
| H  | 2.20355700  | -2.89936700 | 0.74902500  |
| C  | -1.00930900 | -1.97316900 | -1.37072200 |
| O  | -1.48176100 | -2.95104900 | -1.79186300 |
| H  | 2.57133400  | -1.47992400 | -3.15043300 |
| H  | 2.75639800  | 0.23771700  | -2.73435700 |
| H  | 3.71212200  | -2.70887300 | -0.21864100 |
| H  | 2.25608000  | -3.47067800 | -0.93957400 |
| H  | -4.01806700 | -0.04989000 | -1.83963300 |
| H  | -4.17707200 | 1.72950100  | -1.67263700 |
| H  | -3.69133300 | -0.17743300 | 1.13394000  |
| H  | -2.58638500 | 0.97901900  | 1.90599200  |
| B  | -0.39984200 | -1.17316200 | 1.29697700  |
| O  | -1.35258400 | -2.09518500 | 1.81121100  |
| O  | 0.41303100  | -0.80270500 | 2.41654900  |
| C  | -1.10510700 | -2.24960400 | 3.15871100  |
| C  | -0.06421300 | -1.48711600 | 3.52078500  |
| H  | -1.73809600 | -2.92563500 | 3.72757500  |
| H  | 0.42711100  | -1.33561100 | 4.47817600  |

Ru(PNP)(CO)HBcat

|    |             |             |             |
|----|-------------|-------------|-------------|
| Ru | 0.90387000  | 0.03374300  | -0.92762700 |
| P  | 1.21617200  | 2.27713600  | -0.45410200 |
| P  | 0.90399600  | -2.27268200 | -0.78514900 |
| N  | 1.50228900  | -0.17312900 | 1.16802600  |
| C  | 2.05633800  | 0.87711600  | 1.83020500  |
| C  | 2.42273600  | 0.78093700  | 3.17550700  |
| C  | 2.25727500  | -0.42723700 | 3.84898700  |
| C  | 1.72003200  | -1.50962000 | 3.15644200  |
| C  | 1.33740500  | -1.35391600 | 1.82124200  |
| H  | 2.85398700  | 1.64843700  | 3.67710300  |
| H  | 2.54783800  | -0.52518400 | 4.89700500  |
| H  | 1.57705500  | -2.47407800 | 3.64582400  |
| C  | 2.33334500  | 2.13241300  | 1.04154600  |
| C  | 0.68928000  | -2.48507200 | 1.06382300  |
| H  | 3.35077600  | 2.04697900  | 0.61895300  |
| H  | 2.31281500  | 3.02258700  | 1.69021500  |
| H  | 1.03893300  | -3.46154400 | 1.43523400  |
| H  | -0.40032700 | -2.43004000 | 1.23452100  |
| H  | 2.58099400  | 0.06507300  | -1.28269500 |
| C  | 2.16618800  | 3.39936100  | -1.57259000 |
| C  | -0.15117700 | 3.38448600  | 0.12880600  |
| C  | 2.43511400  | -3.24155000 | -1.17319000 |
| C  | -0.42043800 | -3.35507800 | -1.48666200 |
| H  | 3.07672200  | 2.87907200  | -1.90184300 |
| H  | 0.22655600  | 4.35978500  | 0.47660600  |
| H  | 2.34810900  | -4.30064800 | -0.87933400 |
| H  | -1.40456200 | -2.93883600 | -1.22813600 |
| C  | 0.44954900  | 0.18861000  | -2.70845100 |
| O  | 0.17230200  | 0.28238000  | -3.83516400 |
| H  | 2.62411000  | -3.17424700 | -2.25563900 |
| H  | 3.28394600  | -2.77179300 | -0.65536200 |
| H  | -0.33949800 | -4.39119000 | -1.12095800 |
| H  | -0.32737800 | -3.35275100 | -2.58373600 |
| H  | 1.55038800  | 3.61281600  | -2.45988400 |
| H  | 2.42541700  | 4.34924400  | -1.07790300 |
| H  | -0.85676000 | 3.54220400  | -0.70160400 |
| H  | -0.69271200 | 2.88008500  | 0.94255600  |
| B  | -1.15288300 | 0.06871900  | -0.34777400 |
| O  | -2.31649900 | 0.08215800  | -1.17695200 |
| O  | -1.62731700 | 0.10053500  | 1.01342100  |
| C  | -3.41688500 | 0.12512300  | -0.36085100 |
| C  | -2.99947700 | 0.13524300  | 0.97426400  |
| C  | -4.76116300 | 0.15354100  | -0.70487400 |
| C  | -3.90690700 | 0.17367500  | 2.02363800  |
| C  | -5.69013200 | 0.19235200  | 0.35027600  |
| H  | -5.07498600 | 0.14604200  | -1.75000400 |
| C  | -5.27231300 | 0.20201800  | 1.68675900  |
| H  | -3.57007900 | 0.18173200  | 3.06192100  |
| H  | -6.75774300 | 0.21552900  | 0.12063600  |
| H  | -6.01849100 | 0.23254900  | 2.48386900  |

Ru(PNP)(CO)HB(OCH<sub>2</sub>)<sub>2</sub>

|    |             |             |             |
|----|-------------|-------------|-------------|
| Ru | 0.15741000  | -0.45683800 | -0.76013600 |
| P  | -1.97976700 | -1.30427200 | -0.51029600 |
| P  | 1.95889300  | 0.97529400  | -0.92039600 |
| N  | -0.79557300 | 1.35935100  | -0.00308100 |
| C  | -2.15006600 | 1.44226900  | 0.07394000  |
| C  | -2.78451400 | 2.57537500  | 0.59138700  |
| C  | -2.02060300 | 3.66521200  | 1.00212100  |
| C  | -0.63397900 | 3.58775700  | 0.89036400  |
| C  | -0.04486600 | 2.41983400  | 0.39875100  |
| H  | -3.87374800 | 2.60028200  | 0.64784300  |
| H  | -2.49857800 | 4.56339800  | 1.39863500  |
| H  | 0.00120800  | 4.41993800  | 1.19760900  |
| C  | -2.95168300 | 0.29794400  | -0.49161400 |
| C  | 1.45546100  | 2.27600900  | 0.33341700  |
| H  | -3.13980800 | 0.51609300  | -1.55851300 |
| H  | -3.92864200 | 0.21122700  | 0.00989800  |
| H  | 1.93886900  | 3.25334900  | 0.17291400  |
| H  | 1.81046200  | 1.88562200  | 1.30424200  |
| H  | -0.41951000 | 0.00173000  | -2.30866400 |
| C  | -2.81080800 | -2.26241000 | -1.85601800 |
| C  | -2.56497000 | -2.19662900 | 1.00460400  |
| C  | 2.26756700  | 1.95356600  | -2.46490200 |
| C  | 3.67503600  | 0.53394900  | -0.39678800 |
| H  | -2.63682600 | -1.74836000 | -2.81183700 |
| H  | -3.66294900 | -2.28818000 | 1.03265100  |
| H  | 3.04380100  | 2.72398300  | -2.32437900 |
| H  | 3.61705600  | -0.03176800 | 0.54354500  |
| C  | 0.97823600  | -1.97728500 | -1.40348800 |
| O  | 1.49856600  | -2.93645700 | -1.81280700 |
| H  | 2.57992600  | 1.25814700  | -3.25914200 |
| H  | 1.32284100  | 2.41984500  | -2.78067100 |
| H  | 4.31281100  | 1.42533000  | -0.28305400 |
| H  | 4.11180100  | -0.12391500 | -1.16424200 |
| H  | -2.34823800 | -3.25995400 | -1.91237500 |
| H  | -3.89156900 | -2.37777100 | -1.67355400 |
| H  | -2.11843800 | -3.20367800 | 1.00977400  |
| H  | -2.19387200 | -1.65385800 | 1.88534700  |
| B  | 0.75889700  | -0.94281600 | 1.25766200  |
| O  | 1.94463400  | -1.56915600 | 1.67665700  |
| O  | -0.01658600 | -0.63920900 | 2.40053700  |
| C  | 1.99641200  | -1.63922300 | 3.10893700  |
| C  | 0.59888300  | -1.19201200 | 3.57476500  |
| H  | 2.24463500  | -2.66706100 | 3.41932900  |
| H  | 2.79496800  | -0.96939900 | 3.47741800  |
| H  | 0.63217900  | -0.42925500 | 4.36999400  |
| H  | -0.01035200 | -2.03914200 | 3.93892000  |

Ru(PNP)(CO)HB(OH)<sub>2</sub>

|    |             |             |             |
|----|-------------|-------------|-------------|
| Ru | 0.13415900  | -0.70660000 | -0.33909100 |
| P  | -2.16850400 | -0.90402800 | -0.27001100 |
| P  | 2.27222500  | 0.14279800  | -0.48207000 |
| N  | -0.34176000 | 1.41718400  | -0.13659400 |
| C  | -1.61853100 | 1.85314200  | -0.30294200 |
| C  | -1.95761400 | 3.19967600  | -0.14309000 |
| C  | -0.96407700 | 4.12989100  | 0.15335900  |
| C  | 0.34823300  | 3.68290000  | 0.29004000  |
| C  | 0.63146700  | 2.32101500  | 0.15473700  |
| H  | -2.99545000 | 3.50999700  | -0.27329200 |
| H  | -1.20804800 | 5.18780900  | 0.27068900  |
| H  | 1.15728100  | 4.37831400  | 0.51851000  |
| C  | -2.64864100 | 0.84417500  | -0.74217800 |
| C  | 2.02884900  | 1.79523900  | 0.36970500  |
| H  | -2.65994900 | 0.83583600  | -1.84709600 |
| H  | -3.65577300 | 1.12898300  | -0.39853700 |
| H  | 2.78266500  | 2.54934400  | 0.09101600  |
| H  | 2.15436500  | 1.57999700  | 1.44598600  |
| H  | -0.11904500 | -0.49514300 | -2.02204700 |
| C  | -3.10215700 | -1.92578600 | -1.49632300 |
| C  | -3.12193800 | -1.21875300 | 1.28891800  |
| C  | 3.00418700  | 0.59790900  | -2.12401700 |
| C  | 3.73002900  | -0.57117600 | 0.40214800  |
| H  | -2.70096400 | -1.72329200 | -2.49938800 |
| H  | -4.19779900 | -1.01087100 | 1.16833600  |
| H  | 3.94852300  | 1.15870600  | -2.02511800 |
| H  | 3.41635300  | -0.86311900 | 1.41402200  |
| C  | 0.54809600  | -2.49150400 | -0.53617400 |
| O  | 0.80985100  | -3.61938200 | -0.66916500 |
| H  | 3.18481400  | -0.32888700 | -2.69020300 |
| H  | 2.26586900  | 1.19201300  | -2.68227000 |
| H  | 4.57572400  | 0.13432100  | 0.43948500  |
| H  | 4.04579100  | -1.48138300 | -0.13121100 |
| H  | -2.93241500 | -2.98905000 | -1.26608700 |
| H  | -4.18451300 | -1.72017200 | -1.46779800 |
| H  | -2.98766300 | -2.27476500 | 1.57249700  |
| H  | -2.68980900 | -0.59378500 | 2.08326000  |
| B  | 0.37049100  | -0.84661500 | 1.81526800  |
| O  | 1.21371600  | -1.76910900 | 2.44248200  |
| H  | 1.17963100  | -1.71271100 | 3.41485700  |
| O  | -0.32577700 | 0.03723800  | 2.66109000  |
| H  | -0.14825800 | -0.13086200 | 3.60506000  |

Ru(PNP)(CO)HBpin

|    |             |             |             |
|----|-------------|-------------|-------------|
| Ru | 0.73095800  | 0.23331800  | -0.97688400 |
| P  | 1.11137900  | 2.36495000  | -0.16829800 |
| P  | 0.83043300  | -2.05585600 | -1.29007500 |
| N  | 1.75497300  | -0.31968700 | 0.87828900  |
| C  | 2.42411500  | 0.61938200  | 1.60011000  |
| C  | 3.06801800  | 0.29766300  | 2.79831000  |
| C  | 3.06648700  | -1.02120600 | 3.24807000  |
| C  | 2.41491300  | -1.98641200 | 2.48339800  |
| C  | 1.75684900  | -1.61073900 | 1.30841800  |
| H  | 3.58450500  | 1.08037800  | 3.35597600  |
| H  | 3.57286300  | -1.29396200 | 4.17635800  |
| H  | 2.39660100  | -3.03160900 | 2.79560900  |
| C  | 2.51593200  | 2.00842400  | 1.02013500  |
| C  | 0.98879200  | -2.61502800 | 0.48972800  |
| H  | 3.42530500  | 2.04920200  | 0.39356200  |
| H  | 2.62101300  | 2.76576000  | 1.81344800  |
| H  | 1.41104700  | -3.62646500 | 0.60144900  |
| H  | -0.05401300 | -2.62022500 | 0.85231200  |
| H  | 2.30369500  | 0.40070400  | -1.64366300 |
| C  | 1.81369300  | 3.69464100  | -1.24402400 |
| C  | -0.09215500 | 3.32463600  | 0.86555800  |
| C  | 2.28711300  | -2.81885100 | -2.14435700 |
| C  | -0.56591800 | -3.09550900 | -1.91336200 |
| H  | 2.62817900  | 3.26614700  | -1.84489200 |
| H  | 0.35834800  | 4.25039300  | 1.25917400  |
| H  | 2.30249900  | -3.91701200 | -2.04586300 |
| H  | -1.47155000 | -2.82521500 | -1.35315400 |
| C  | -0.11209000 | 0.69680100  | -2.54747300 |
| O  | -0.65045200 | 0.98771500  | -3.54023000 |
| H  | 2.24772500  | -2.54532200 | -3.21013100 |
| H  | 3.20488900  | -2.38525100 | -1.72147400 |
| H  | -0.35770500 | -4.17168600 | -1.79991400 |
| H  | -0.72576600 | -2.87037100 | -2.97915700 |
| H  | 1.02417200  | 4.04103800  | -1.92885300 |
| H  | 2.18033100  | 4.55162200  | -0.65604200 |
| H  | -0.97363800 | 3.56316700  | 0.25330000  |
| H  | -0.43276400 | 2.68914400  | 1.69552600  |
| B  | -1.23022200 | 0.06522200  | -0.06414500 |
| O  | -1.74778400 | -1.04394400 | 0.64966500  |
| O  | -2.22177200 | 1.05820800  | -0.09348300 |
| C  | -3.01478600 | -0.68920800 | 1.27000400  |
| C  | -3.48155100 | 0.52723300  | 0.39103200  |
| C  | -3.93652000 | -1.90756800 | 1.23797700  |
| C  | -2.71341300 | -0.30917000 | 2.72685700  |
| C  | -4.29731800 | 0.11135600  | -0.84187800 |
| C  | -4.21980500 | 1.63157200  | 1.14728200  |
| H  | -4.06154800 | -2.29917000 | 0.21968600  |
| H  | -4.93281800 | -1.66007500 | 1.64006300  |
| H  | -3.51374900 | -2.71176000 | 1.86068100  |
| H  | -2.19579100 | -1.14885200 | 3.21598300  |
| H  | -2.05483500 | 0.57034700  | 2.78127800  |
| H  | -3.63176000 | -0.09357300 | 3.29575100  |
| H  | -3.78862100 | -0.68454400 | -1.40550700 |
| H  | -4.39667500 | 0.98050800  | -1.50927500 |
| H  | -5.30759000 | -0.23635700 | -0.57296900 |
| H  | -5.16024100 | 1.25577400  | 1.58338400  |
| H  | -3.60646500 | 2.05524500  | 1.95370200  |
| H  | -4.47276300 | 2.44738000  | 0.45253900  |

Ru(PNP)(CO)HB(NHCH<sub>2</sub>)<sub>2</sub>

|    |             |             |             |
|----|-------------|-------------|-------------|
| Ru | 0.25484900  | -0.32945500 | -0.80730100 |
| P  | -1.28793400 | -2.00495300 | -0.43676300 |
| P  | 1.27986200  | 1.72844000  | -0.97249900 |
| N  | -1.32692200 | 0.89528700  | 0.08066500  |
| C  | -2.58622500 | 0.39792100  | 0.22103000  |
| C  | -3.61355700 | 1.15787500  | 0.78756300  |
| C  | -3.36204100 | 2.47030200  | 1.18318600  |
| C  | -2.07881100 | 2.98519000  | 1.00995900  |
| C  | -1.07467400 | 2.17571500  | 0.47057900  |
| H  | -4.60782700 | 0.72094500  | 0.89222100  |
| H  | -4.15509300 | 3.08379600  | 1.61576800  |
| H  | -1.84020700 | 4.00786500  | 1.30581100  |
| C  | -2.85334100 | -0.98000400 | -0.32851700 |
| C  | 0.34325200  | 2.66961600  | 0.34849600  |
| H  | -3.17420900 | -0.86357900 | -1.37958400 |
| H  | -3.66992000 | -1.47696200 | 0.21970400  |
| H  | 0.37625400  | 3.76357900  | 0.22345200  |
| H  | 0.86554500  | 2.40606300  | 1.28601400  |
| H  | -0.57490600 | -0.11222600 | -2.29470900 |
| C  | -1.71739100 | -3.26328200 | -1.72164900 |
| C  | -1.32491600 | -3.02504200 | 1.11324300  |
| C  | 1.10047000  | 2.77832100  | -2.49121700 |
| C  | 3.04563500  | 2.03799700  | -0.51380000 |
| H  | -1.84146600 | -2.74958300 | -2.68550500 |
| H  | -2.24703400 | -3.62280400 | 1.20146800  |
| H  | 1.48687500  | 3.80070800  | -2.34455000 |
| H  | 3.26211200  | 1.52081400  | 0.43195400  |
| C  | 1.59319600  | -1.34557900 | -1.54505600 |
| O  | 2.46399600  | -1.98806600 | -1.98814000 |
| H  | 1.64703800  | 2.29348000  | -3.31495600 |
| H  | 0.03674900  | 2.81023800  | -2.76892600 |
| H  | 3.26478900  | 3.11372400  | -0.41906200 |
| H  | 3.68924200  | 1.60917600  | -1.29774800 |
| H  | -0.87729900 | -3.96902100 | -1.81299300 |
| H  | -2.63143100 | -3.82287600 | -1.46496400 |
| H  | -0.45120800 | -3.69489500 | 1.11229000  |
| H  | -1.22599600 | -2.35244300 | 1.97810200  |
| B  | 1.20045000  | -0.56641500 | 1.16083900  |
| N  | 2.41135400  | -1.26809800 | 1.50698700  |
| N  | 0.74669300  | -0.01447500 | 2.43816900  |
| C  | 2.81505500  | -1.03930300 | 2.89260800  |
| H  | 3.11513400  | -1.57466200 | 0.84834600  |
| C  | 1.49566300  | -0.59905600 | 3.55691300  |
| H  | -0.22345000 | 0.21230000  | 2.62249000  |
| H  | 3.57550000  | -0.23316000 | 2.97981900  |
| H  | 3.23747400  | -1.93751200 | 3.37631100  |
| H  | 1.66848400  | 0.11535500  | 4.38101600  |
| H  | 0.97660900  | -1.48102500 | 3.98855600  |

Ru(PNP)(CO)HB(OCH<sub>3</sub>)<sub>2</sub>

|    |             |             |             |
|----|-------------|-------------|-------------|
| Ru | 0.31988200  | -0.37642400 | -0.75213600 |
| P  | -1.34326100 | -1.96318000 | -0.50396600 |
| P  | 1.44442400  | 1.62829700  | -0.94539700 |
| N  | -1.26357700 | 0.96364000  | -0.06326300 |
| C  | -2.54981600 | 0.52808500  | -0.00019300 |
| C  | -3.57613800 | 1.34606800  | 0.48143300  |
| C  | -3.29041700 | 2.65256700  | 0.87104500  |
| C  | -1.97611700 | 3.10483900  | 0.77350000  |
| C  | -0.97933700 | 2.23838200  | 0.31618700  |
| H  | -4.59445500 | 0.95702700  | 0.52673500  |
| H  | -4.08053700 | 3.31020900  | 1.23946500  |
| H  | -1.70998700 | 4.12249500  | 1.06349600  |
| C  | -2.84726200 | -0.84559700 | -0.54390300 |
| C  | 0.46299600  | 2.67766000  | 0.25944400  |
| H  | -3.07656700 | -0.73604800 | -1.61939900 |
| H  | -3.73189100 | -1.28385500 | -0.05500500 |
| H  | 0.53734100  | 3.75961700  | 0.06238400  |
| H  | 0.92743000  | 2.48888000  | 1.24396600  |
| H  | -0.35976900 | -0.21029100 | -2.32333100 |
| C  | -1.71818500 | -3.19149300 | -1.83478900 |
| C  | -1.59268800 | -2.98301200 | 1.02409700  |
| C  | 1.38024900  | 2.60319500  | -2.52225800 |
| C  | 3.19106200  | 1.89451800  | -0.40391600 |
| H  | -1.72525800 | -2.66966400 | -2.80202000 |
| H  | -2.57458800 | -3.48399300 | 1.03265700  |
| H  | 1.80322900  | 3.61544200  | -2.40946800 |
| H  | 3.34259800  | 1.36886200  | 0.54906200  |
| C  | 1.66824200  | -1.49019600 | -1.32669700 |
| O  | 2.52627600  | -2.19468300 | -1.68467100 |
| H  | 1.94357900  | 2.05297300  | -3.29166300 |
| H  | 0.33322200  | 2.66311700  | -2.85365000 |
| H  | 3.43337800  | 2.96529100  | -0.30971100 |
| H  | 3.85737900  | 1.44085800  | -1.15415600 |
| H  | -0.91247600 | -3.94171200 | -1.85441200 |
| H  | -2.68026000 | -3.70235200 | -1.66689900 |
| H  | -0.79801200 | -3.74467600 | 1.06720600  |
| H  | -1.48195400 | -2.32376300 | 1.89617100  |
| B  | 1.03411400  | -0.54152100 | 1.29713300  |
| O  | 2.39386000  | -0.68043600 | 1.61415000  |
| O  | 0.09874700  | -0.47369700 | 2.35134300  |
| C  | 2.91121200  | -1.40168300 | 2.72377000  |
| H  | 3.84124500  | -1.89802400 | 2.40235200  |
| H  | 3.15277300  | -0.74000200 | 3.57506900  |
| H  | 2.21172900  | -2.17875000 | 3.07711300  |
| C  | 0.39730200  | -0.07165500 | 3.68214900  |
| H  | 0.63274100  | -0.93056300 | 4.33514200  |
| H  | 1.24574800  | 0.63350400  | 3.72161600  |
| H  | -0.49211600 | 0.43392000  | 4.09307900  |

Ru(PNP)(CO)HB(CH<sub>3</sub>)<sub>2</sub>

|    |             |             |             |
|----|-------------|-------------|-------------|
| Ru | 0.12054800  | -0.69202700 | -0.34071500 |
| P  | -2.18792500 | -0.82315200 | -0.31576200 |
| P  | 2.28161500  | 0.10161200  | -0.47842100 |
| N  | -0.29250800 | 1.44598500  | -0.10588900 |
| C  | -1.55648400 | 1.92256100  | -0.26846700 |
| C  | -1.85507000 | 3.27759300  | -0.09945000 |
| C  | -0.83402900 | 4.17732200  | 0.19924300  |
| C  | 0.46558100  | 3.69092600  | 0.32422100  |
| C  | 0.70852400  | 2.32228600  | 0.18020200  |
| H  | -2.88369200 | 3.61897700  | -0.22536500 |
| H  | -1.04651300 | 5.24090300  | 0.32505200  |
| H  | 1.29615800  | 4.36137600  | 0.55015500  |
| C  | -2.61835500 | 0.95323800  | -0.72415400 |
| C  | 2.09551900  | 1.75975200  | 0.37210800  |
| H  | -2.64275100 | 0.98286700  | -1.82848900 |
| H  | -3.61382500 | 1.25380600  | -0.36045700 |
| H  | 2.86194900  | 2.49250300  | 0.07209400  |
| H  | 2.24230900  | 1.54923600  | 1.44627200  |
| H  | -0.13282600 | -0.40512900 | -2.02334500 |
| C  | -3.11399300 | -1.77457300 | -1.60263400 |
| C  | -3.20407700 | -1.18028200 | 1.19740500  |
| C  | 3.00796200  | 0.52807100  | -2.13072200 |
| C  | 3.74225400  | -0.64149300 | 0.38173000  |
| H  | -2.67446300 | -1.55174200 | -2.58491400 |
| H  | -4.27929800 | -1.00960400 | 1.02317500  |
| H  | 3.96856800  | 1.06282000  | -2.04574700 |
| H  | 3.48468000  | -0.84438800 | 1.43108000  |
| C  | 0.48589300  | -2.47184700 | -0.61209800 |
| O  | 0.72584000  | -3.59970300 | -0.79399000 |
| H  | 3.15514700  | -0.40606500 | -2.69451300 |
| H  | 2.27819600  | 1.13870900  | -2.68194600 |
| H  | 4.62642300  | 0.01422500  | 0.33068500  |
| H  | 3.98059200  | -1.60125000 | -0.10247800 |
| H  | -2.98607600 | -2.84988300 | -1.40347200 |
| H  | -4.18936800 | -1.53381500 | -1.59889400 |
| H  | -3.04751700 | -2.23118500 | 1.48667200  |
| H  | -2.85583100 | -0.54408400 | 2.02401700  |
| B  | 0.31335900  | -0.95033200 | 1.82134800  |
| C  | 0.83472300  | -2.28309300 | 2.53358500  |
| H  | 1.27148400  | -2.12280400 | 3.54000900  |
| H  | -0.06937800 | -2.90817200 | 2.70140700  |
| H  | 1.52052600  | -2.91432000 | 1.94647400  |
| C  | -0.11647300 | 0.15712900  | 2.90006300  |
| H  | -0.69098700 | -0.29261700 | 3.73529800  |
| H  | 0.81132700  | 0.53517300  | 3.38125200  |
| H  | -0.67212700 | 1.03858900  | 2.54039400  |

Ru(PNP)(CO)HBH<sub>2</sub>

|    |             |             |             |
|----|-------------|-------------|-------------|
| Ru | -0.01156300 | -0.80917200 | -0.04900500 |
| P  | -2.29829200 | -0.45301900 | -0.07825600 |
| P  | 2.27148700  | -0.49493700 | -0.19378300 |
| N  | 0.02367700  | 1.38103200  | -0.02475500 |
| C  | -1.11383800 | 2.08966900  | -0.25506600 |
| C  | -1.13369400 | 3.48523600  | -0.18283500 |
| C  | 0.04415000  | 4.17713800  | 0.09147200  |
| C  | 1.21441400  | 3.44829900  | 0.29006200  |
| C  | 1.17625000  | 2.05179800  | 0.23900100  |
| H  | -2.06857700 | 4.01829800  | -0.36218500 |
| H  | 0.05087400  | 5.26778500  | 0.14347500  |
| H  | 2.15949000  | 3.95117900  | 0.50066700  |
| C  | -2.34223500 | 1.32027500  | -0.67340800 |
| C  | 2.42017300  | 1.23758100  | 0.50344900  |
| H  | -2.32816900 | 1.23992500  | -1.77539900 |
| H  | -3.26303700 | 1.85236100  | -0.38652900 |
| H  | 3.31863400  | 1.76971600  | 0.15117200  |
| H  | 2.52181500  | 1.10273800  | 1.59471400  |
| H  | -0.19083600 | -0.67207000 | -1.77312300 |
| C  | -3.40928500 | -1.32151400 | -1.27162900 |
| C  | -3.33633100 | -0.43286800 | 1.45854300  |
| C  | 3.10940700  | -0.39191200 | -1.84375500 |
| C  | 3.50745700  | -1.44682500 | 0.79982900  |
| H  | -2.93955500 | -1.29816200 | -2.26487000 |
| H  | -4.35843400 | -0.06715900 | 1.26648900  |
| H  | 4.15463800  | -0.04975800 | -1.76409300 |
| H  | 3.18592400  | -1.46800000 | 1.85156700  |
| C  | -0.02770000 | -2.64780200 | -0.00559800 |
| O  | -0.03429600 | -3.81241600 | 0.04661800  |
| H  | 3.08264600  | -1.38962500 | -2.30844300 |
| H  | 2.53184200  | 0.29046500  | -2.48405900 |
| H  | 4.51879100  | -1.01604000 | 0.72339600  |
| H  | 3.52949100  | -2.48325700 | 0.42911900  |
| H  | -3.50447700 | -2.37306900 | -0.95977200 |
| H  | -4.41155500 | -0.86479600 | -1.30810500 |
| H  | -3.38579300 | -1.45579000 | 1.86301400  |
| H  | -2.84743700 | 0.20511300  | 2.21046200  |
| B  | 0.08324100  | -0.77509800 | 2.05960100  |
| H  | 0.07228000  | -1.73493500 | 2.81577600  |
| H  | 0.12212100  | 0.29113600  | 2.67547800  |

Ru(PNP)(CO)H<sub>2</sub>-CO<sub>2</sub> IS

|    |             |             |             |
|----|-------------|-------------|-------------|
| Ru | -0.12485200 | -0.85327100 | -0.40834000 |
| P  | -2.37628200 | -0.46165700 | -0.09635500 |
| P  | 2.13996800  | -0.58260100 | -0.75244900 |
| N  | -0.07381800 | 1.33275000  | -0.48062700 |
| C  | -1.22440600 | 2.04267500  | -0.62720400 |
| C  | -1.22120800 | 3.44042500  | -0.65697300 |
| C  | -0.01221300 | 4.12760000  | -0.57261900 |
| C  | 1.16560800  | 3.39456400  | -0.44424100 |
| C  | 1.10812900  | 1.99891200  | -0.38329900 |
| H  | -2.16502400 | 3.97666500  | -0.76618300 |
| H  | 0.01190800  | 5.21880200  | -0.60742800 |
| H  | 2.13245100  | 3.89467100  | -0.37058900 |
| C  | -2.50142200 | 1.26473800  | -0.81774800 |
| C  | 2.35205500  | 1.17994200  | -0.14947300 |
| H  | -2.63814900 | 1.09745100  | -1.90134700 |
| H  | -3.37202100 | 1.83355400  | -0.45371600 |
| H  | 3.24124200  | 1.68356500  | -0.56176000 |
| H  | 2.49834200  | 1.08122800  | 0.94078700  |
| H  | -0.45898500 | -0.83577800 | -2.06863400 |
| C  | -3.70001200 | -1.36997600 | -1.01418100 |
| C  | -3.12217100 | -0.30411300 | 1.59270300  |
| C  | 2.86564700  | -0.56613900 | -2.45755800 |
| C  | 3.42785300  | -1.49185500 | 0.21283200  |
| H  | -3.41930000 | -1.42299300 | -2.07584400 |
| H  | -4.13839500 | 0.12270700  | 1.56449900  |
| H  | 3.91859000  | -0.23941100 | -2.46567400 |
| H  | 3.16860700  | -1.43543000 | 1.27952100  |
| C  | -0.16377700 | -2.69310900 | -0.35550400 |
| O  | -0.18669700 | -3.85838400 | -0.32084100 |
| H  | 0.20785500  | -0.75871700 | 1.25084400  |
| H  | -3.75712800 | -2.39711900 | -0.62202500 |
| H  | -4.68499500 | -0.88798500 | -0.90402300 |
| H  | -3.16130000 | -1.30677800 | 2.04663900  |
| H  | -2.46367300 | 0.31590800  | 2.21785600  |
| H  | 2.79412700  | -1.58277700 | -2.87428900 |
| H  | 3.41647200  | -2.54905200 | -0.09415100 |
| H  | 4.43593100  | -1.07886500 | 0.04639600  |
| H  | 2.25794000  | 0.09783600  | -3.08980700 |
| C  | 0.87349400  | 0.16029600  | 3.62259800  |
| O  | -0.24057900 | 0.18277400  | 3.96850700  |
| O  | 2.00789700  | 0.16902200  | 3.33687500  |

Ru(PNP)(CO)H<sub>2</sub>-CO<sub>2</sub> TS

|    |             |             |             |
|----|-------------|-------------|-------------|
| Ru | -0.03816900 | -0.82555900 | -0.33298900 |
| P  | 2.23369300  | -0.43536500 | -0.58468900 |
| P  | -2.33587000 | -0.56888400 | -0.19322800 |
| N  | -0.09034300 | 1.35878700  | -0.36496200 |
| C  | 1.05160800  | 2.07766400  | -0.18967000 |
| C  | 1.03817400  | 3.47563000  | -0.19663900 |
| C  | -0.16967800 | 4.15156800  | -0.35278800 |
| C  | -1.33598900 | 3.40956100  | -0.52387000 |
| C  | -1.26804900 | 2.01355700  | -0.54602300 |
| H  | 1.97247500  | 4.02110100  | -0.05723500 |
| H  | -0.20141300 | 5.24303900  | -0.34324300 |
| H  | -2.29977200 | 3.90230900  | -0.65909200 |
| C  | 2.32825600  | 1.31658100  | 0.06979800  |
| C  | -2.49391200 | 1.18484300  | -0.83845700 |
| H  | 2.44001300  | 1.19011400  | 1.16101200  |
| H  | 3.20399400  | 1.87562900  | -0.29655800 |
| H  | -3.40739400 | 1.69335400  | -0.49176700 |
| H  | -2.57251500 | 1.07255900  | -1.93491200 |
| H  | 0.18489600  | -0.73501200 | 1.39823900  |
| H  | -0.25644500 | -0.81431000 | -1.97913400 |
| C  | 3.51900900  | -1.31498100 | 0.40427500  |
| C  | 2.99198100  | -0.34291200 | -2.27018100 |
| C  | -3.23594000 | -0.56003300 | 1.42089100  |
| C  | -3.49420600 | -1.50432000 | -1.28834700 |
| H  | 3.20394900  | -1.30319200 | 1.45727600  |
| H  | 4.02489400  | 0.04065500  | -2.24052100 |
| H  | -4.25350100 | -0.14852200 | 1.32139900  |
| H  | -3.11103300 | -1.47706100 | -2.31847000 |
| C  | 0.01556400  | -2.66812300 | -0.34110600 |
| O  | 0.05085900  | -3.83161700 | -0.35662000 |
| C  | 0.47945400  | -0.08022500 | 2.91704500  |
| O  | -0.59824900 | 0.26981700  | 3.28277200  |
| O  | 1.65955800  | -0.20708400 | 3.04879900  |
| H  | -2.64884900 | 0.01288600  | 2.15216500  |
| H  | -3.29857300 | -1.59828200 | 1.78346400  |
| H  | -3.51721700 | -2.55402700 | -0.95736600 |
| H  | -4.51629500 | -1.09417200 | -1.25173800 |
| H  | 4.50917000  | -0.84329100 | 0.29818500  |
| H  | 3.57647500  | -2.35852500 | 0.05869200  |
| H  | 2.36730900  | 0.30229500  | -2.90521600 |
| H  | 2.98934700  | -1.35249400 | -2.70934800 |

Ru(PNP)(CO)H<sub>2</sub>-CO<sub>2</sub> FS

|    |             |             |             |
|----|-------------|-------------|-------------|
| Ru | -0.03314200 | -0.84471200 | -0.27183600 |
| P  | 2.26081600  | -0.46433700 | -0.50348000 |
| P  | -2.34383700 | -0.58294100 | -0.17004400 |
| N  | -0.07731400 | 1.33586800  | -0.37971200 |
| C  | 1.06630400  | 2.05768700  | -0.22247100 |
| C  | 1.05292800  | 3.45489600  | -0.26969600 |
| C  | -0.15413000 | 4.12620500  | -0.44303000 |
| C  | -1.32173200 | 3.38180200  | -0.59146800 |
| C  | -1.25512000 | 1.98650000  | -0.57527600 |
| H  | 1.98686200  | 4.00343600  | -0.14208100 |
| H  | -0.18522300 | 5.21754700  | -0.46174200 |
| H  | -2.28533400 | 3.87195900  | -0.73571800 |
| C  | 2.34308200  | 1.31146100  | 0.07224100  |
| C  | -2.48816200 | 1.15877600  | -0.84333500 |
| H  | 2.43913900  | 1.22510700  | 1.17016400  |
| H  | 3.21978500  | 1.85543800  | -0.31293100 |
| H  | -3.39340100 | 1.67669000  | -0.48987400 |
| H  | -2.58574800 | 1.03620300  | -1.93716700 |
| H  | 0.10842000  | -0.75474500 | 1.57796200  |
| C  | 3.50489500  | -1.31185000 | 0.55644100  |
| C  | 3.02196700  | -0.46065500 | -2.18730900 |
| C  | -3.21272800 | -0.55510800 | 1.45476900  |
| C  | -3.48656300 | -1.53967300 | -1.26064100 |
| H  | 3.14417000  | -1.23356800 | 1.59325000  |
| H  | 4.05770600  | -0.08522900 | -2.16652500 |
| H  | -4.20868300 | -0.09039900 | 1.37612600  |
| H  | -3.10207500 | -1.52486200 | -2.29079800 |
| C  | 0.01865800  | -2.69022500 | -0.26098600 |
| O  | 0.05314600  | -3.85155200 | -0.28159800 |
| H  | -0.19372800 | -0.91198200 | -1.87829400 |
| H  | 3.56440200  | -2.37067900 | 0.26201200  |
| H  | 4.50020100  | -0.84929300 | 0.46029500  |
| H  | 3.01520100  | -1.48932400 | -2.57923800 |
| H  | 2.41009000  | 0.16249600  | -2.85600100 |
| H  | -3.32350600 | -1.59465700 | 1.80192100  |
| H  | -3.50749100 | -2.58450800 | -0.91486800 |
| H  | -4.51012700 | -1.13294200 | -1.23401500 |
| H  | -2.56926300 | -0.01793900 | 2.17068200  |
| C  | 0.37346500  | 0.01148100  | 2.56863400  |
| O  | -0.63099300 | 0.59802800  | 2.95286800  |
| O  | 1.56361700  | -0.05536200 | 2.86888300  |

Ru(PNP)(CO)HB(OCH<sub>3</sub>)<sub>2</sub>-CO<sub>2</sub> IS

|    |             |             |             |
|----|-------------|-------------|-------------|
| Ru | -0.21417600 | -0.21556000 | 0.68941200  |
| P  | -0.25227800 | 2.05001500  | 1.14027000  |
| P  | 0.23002600  | -2.28553400 | -0.23797600 |
| N  | 0.79099300  | 0.48152800  | -1.12739200 |
| C  | 0.77741700  | 1.79996800  | -1.46181600 |
| C  | 1.42226300  | 2.26837300  | -2.61122200 |
| C  | 2.07322300  | 1.37005600  | -3.45271300 |
| C  | 2.08617300  | 0.02083300  | -3.10427100 |
| C  | 1.45742600  | -0.39530100 | -1.92730700 |
| H  | 1.39407800  | 3.33423400  | -2.84256000 |
| H  | 2.56914100  | 1.71614100  | -4.36205500 |
| H  | 2.60049800  | -0.71452600 | -3.72487300 |
| C  | 0.00735700  | 2.74707700  | -0.57738400 |
| C  | 1.57063700  | -1.82752800 | -1.46378500 |
| H  | -1.01154400 | 2.82826300  | -0.99095800 |
| H  | 0.46666100  | 3.74845200  | -0.57628600 |
| H  | 1.62712500  | -2.51683900 | -2.32156500 |
| H  | 2.51423800  | -1.92469500 | -0.89846900 |
| C  | -1.75179300 | 2.97186500  | 1.71604700  |
| C  | 1.07310500  | 2.83390500  | 2.17062400  |
| C  | -0.98206500 | -3.25028700 | -1.25926700 |
| C  | 1.02385100  | -3.62919300 | 0.75419500  |
| H  | -2.60188800 | 2.70066100  | 1.07428800  |
| H  | 1.03845700  | 3.93512000  | 2.12696500  |
| H  | -0.52636500 | -4.16067700 | -1.68173200 |
| H  | 1.87084600  | -3.19986500 | 1.30700100  |
| C  | -1.04692800 | -0.79761400 | 2.22357100  |
| O  | -1.57868500 | -1.16302100 | 3.19515600  |
| H  | 1.35766200  | -0.34697700 | 1.37629000  |
| B  | -2.15178100 | -0.10023500 | -0.29308600 |
| O  | -2.42539400 | 0.91328400  | -1.23857600 |
| O  | -3.14326400 | -1.05304100 | -0.03055700 |
| C  | -4.54414300 | -0.83358800 | -0.10420700 |
| H  | -4.80826800 | 0.22967500  | 0.03018200  |
| H  | -4.96966400 | -1.17732100 | -1.06435900 |
| H  | -5.02086000 | -1.40959600 | 0.70548500  |
| C  | -3.34334800 | 0.78941800  | -2.31882900 |
| H  | -3.46296500 | -0.25887000 | -2.64134500 |
| H  | -2.94887100 | 1.36961400  | -3.16953600 |
| H  | -4.34116200 | 1.18912100  | -2.06601400 |
| H  | -1.35539800 | -2.60994100 | -2.07181300 |
| H  | -1.84121400 | -3.51693000 | -0.62673500 |
| H  | 1.36533900  | -4.46449900 | 0.12158300  |
| H  | 0.28701600  | -4.00604600 | 1.48034000  |
| H  | 2.05167200  | 2.46654900  | 1.83185300  |
| H  | 0.93619400  | 2.50609300  | 3.21315400  |
| H  | -1.97884400 | 2.66337500  | 2.74831200  |
| H  | -1.59687800 | 4.06289600  | 1.69379100  |
| C  | 4.04639500  | -0.28558100 | 1.36262400  |
| O  | 4.09087600  | -1.42680100 | 1.11160900  |
| O  | 4.07485200  | 0.85584000  | 1.60488600  |

Ru(PNP)(CO)HB(OCH<sub>3</sub>)<sub>2</sub>-CO<sub>2</sub> TS

|    |             |             |             |
|----|-------------|-------------|-------------|
| Ru | -0.19785700 | 0.22226800  | -0.65428300 |
| P  | -0.27203300 | -2.04430300 | -1.15171200 |
| P  | 0.24438800  | 2.27983300  | 0.33139700  |
| N  | 0.97116800  | -0.49958900 | 1.05117600  |
| C  | 1.02298400  | -1.82706700 | 1.33982900  |
| C  | 1.79576300  | -2.31266000 | 2.39971300  |
| C  | 2.50674900  | -1.42201200 | 3.19904600  |
| C  | 2.44864400  | -0.06255100 | 2.89976300  |
| C  | 1.69295000  | 0.37218700  | 1.80753000  |
| H  | 1.82083800  | -3.38551300 | 2.59559600  |
| H  | 3.10451900  | -1.78207800 | 4.03903200  |
| H  | 3.00665700  | 0.66641000  | 3.48908900  |
| C  | 0.18441100  | -2.76894800 | 0.51354600  |
| C  | 1.72217700  | 1.82128400  | 1.38448100  |
| H  | -0.78174300 | -2.89065100 | 1.02986800  |
| H  | 0.66472900  | -3.75684500 | 0.43394900  |
| H  | 1.85893700  | 2.48395400  | 2.25398300  |
| H  | 2.59079800  | 1.96429500  | 0.71810000  |
| C  | -1.83419900 | -2.94959900 | -1.55984900 |
| C  | 0.92016500  | -2.79902500 | -2.34604400 |
| C  | -0.90798300 | 3.10866700  | 1.52189600  |
| C  | 0.86092800  | 3.70371500  | -0.66853400 |
| H  | -2.59697800 | -2.69640300 | -0.81029400 |
| H  | 0.91495000  | -3.89960400 | -2.28650800 |
| H  | -0.46594500 | 4.02784600  | 1.93901300  |
| H  | 1.65866200  | 3.33922900  | -1.33000600 |
| C  | -1.15014500 | 0.83682700  | -2.10574000 |
| O  | -1.75344600 | 1.22278900  | -3.02418500 |
| H  | 1.36184400  | 0.38197200  | -1.46860900 |
| B  | -2.04474700 | 0.05650400  | 0.43498100  |
| O  | -2.22084400 | -0.97337900 | 1.38057800  |
| O  | -3.07159800 | 0.98352700  | 0.23909200  |
| C  | -4.46009000 | 0.73812500  | 0.41376600  |
| H  | -4.71572300 | -0.32730600 | 0.28182100  |
| H  | -4.81662400 | 1.06089600  | 1.40816900  |
| H  | -5.00363500 | 1.31798100  | -0.34919300 |
| C  | -3.07282500 | -0.89816100 | 2.51882500  |
| H  | -3.19528400 | 0.13861400  | 2.87515700  |
| H  | -2.61233100 | -1.48945200 | 3.32713300  |
| H  | -4.07430600 | -1.31598100 | 2.31658000  |
| H  | -1.14625700 | 2.40945500  | 2.33709200  |
| H  | -1.84506100 | 3.34377400  | 0.99725900  |
| H  | 1.23800000  | 4.51828300  | -0.02937100 |
| H  | 0.02954300  | 4.08210300  | -1.28310400 |
| H  | 1.92413000  | -2.40171200 | -2.14484700 |
| H  | 0.63016700  | -2.48956500 | -3.36260500 |
| H  | -2.18581700 | -2.61787500 | -2.54899000 |
| H  | -1.67801800 | -4.04031800 | -1.58270400 |
| C  | 3.12901700  | 0.45281700  | -1.70635400 |
| O  | 3.42618600  | -0.69528400 | -1.76564900 |
| O  | 3.33327900  | 1.62468900  | -1.69943600 |

Ru(PNP)(CO)HB(OCH<sub>3</sub>)<sub>2</sub>-CO<sub>2</sub> FS

|    |             |             |             |
|----|-------------|-------------|-------------|
| Ru | -0.28987800 | -0.15606400 | 0.63382200  |
| P  | -0.18352300 | 2.15129800  | 1.00517900  |
| P  | 0.06947200  | -2.32755800 | -0.18419000 |
| N  | 1.15065400  | 0.33525500  | -0.93979200 |
| C  | 1.38980100  | 1.63246600  | -1.27079400 |
| C  | 2.35454700  | 1.97413000  | -2.22213500 |
| C  | 3.06866700  | 0.96918500  | -2.86881600 |
| C  | 2.81833500  | -0.35703800 | -2.52854700 |
| C  | 1.87243100  | -0.65023300 | -1.54193500 |
| H  | 2.53012400  | 3.02530800  | -2.45377500 |
| H  | 3.81954400  | 1.21736700  | -3.62186900 |
| H  | 3.37476500  | -1.17125900 | -2.99417300 |
| C  | 0.55229000  | 2.70543700  | -0.62153800 |
| C  | 1.70059400  | -2.06695700 | -1.05397900 |
| H  | -0.31942300 | 2.88986200  | -1.27070100 |
| H  | 1.12177200  | 3.64302800  | -0.52789900 |
| H  | 1.88086400  | -2.79130700 | -1.86360600 |
| H  | 2.45073300  | -2.23529200 | -0.25872400 |
| C  | -1.67764400 | 3.22690700  | 1.16511300  |
| C  | 0.94614000  | 2.79622900  | 2.30865400  |
| C  | -1.02150200 | -3.10017100 | -1.46221500 |
| C  | 0.41297400  | -3.70441200 | 0.98812100  |
| H  | -2.36718000 | 3.01011300  | 0.33725900  |
| H  | 1.13427100  | 3.87380700  | 2.17622800  |
| H  | -0.62421700 | -4.07802000 | -1.77743900 |
| H  | 1.18333900  | -3.34037900 | 1.68568000  |
| C  | -1.46867000 | -0.59046100 | 1.98522700  |
| O  | -2.21306700 | -0.86008700 | 2.83583200  |
| H  | 1.25034000  | -0.37734400 | 1.79910400  |
| B  | -1.95333500 | 0.07649700  | -0.61181500 |
| O  | -1.93363800 | 1.07004000  | -1.60197000 |
| O  | -3.05957500 | -0.75694600 | -0.47563200 |
| C  | -4.39870400 | -0.42262100 | -0.81946100 |
| H  | -4.57610500 | 0.66557700  | -0.79144100 |
| H  | -4.66923200 | -0.79694500 | -1.82219800 |
| H  | -5.06367100 | -0.89999900 | -0.08292800 |
| C  | -2.65169600 | 1.00529600  | -2.83106200 |
| H  | -2.84002400 | -0.03482900 | -3.14476900 |
| H  | -2.04122600 | 1.49631400  | -3.60577600 |
| H  | -3.61894900 | 1.53252500  | -2.76879900 |
| H  | -1.09322400 | -2.43331700 | -2.33439700 |
| H  | -2.03025200 | -3.21930700 | -1.04245100 |
| H  | 0.76864000  | -4.60335500 | 0.45962300  |
| H  | -0.51178900 | -3.94330800 | 1.53504600  |
| H  | 1.88201500  | 2.21311000  | 2.26313500  |
| H  | 0.47353800  | 2.62718800  | 3.28914800  |
| H  | -2.17905100 | 2.99477800  | 2.11712700  |
| H  | -1.40509200 | 4.29444900  | 1.15555800  |
| C  | 2.48072100  | -0.54031800 | 1.87261800  |
| O  | 3.09181400  | 0.52884300  | 1.87609000  |
| O  | 2.78662500  | -1.73709400 | 1.91344700  |

Ru(PNP)(CO)HB(NHCH<sub>2</sub>)<sub>2</sub>-CO<sub>2</sub> IS

|    |             |             |             |
|----|-------------|-------------|-------------|
| Ru | -0.13849200 | 0.14498500  | -0.73435000 |
| P  | 0.48897600  | 2.27079100  | -0.09383500 |
| P  | -0.46605400 | -2.13959200 | -0.81288100 |
| N  | 0.67237400  | -0.36028800 | 1.23433100  |
| C  | 1.42024800  | 0.54396900  | 1.92481500  |
| C  | 1.94711500  | 0.24522100  | 3.18484700  |
| C  | 1.73984800  | -1.01719800 | 3.73786900  |
| C  | 0.99305500  | -1.94665000 | 3.01696900  |
| C  | 0.45581300  | -1.59089200 | 1.77615600  |
| H  | 2.53483200  | 0.99882900  | 3.71127900  |
| H  | 2.15549700  | -1.27292400 | 4.71473800  |
| H  | 0.80390600  | -2.94462800 | 3.41503500  |
| C  | 1.72724600  | 1.85903500  | 1.25213300  |
| C  | -0.43710000 | -2.53761400 | 1.01691400  |
| H  | 2.68701400  | 1.74908000  | 0.71705100  |
| H  | 1.85152400  | 2.66390400  | 1.99434000  |
| H  | -0.18614900 | -3.58716000 | 1.23820700  |
| H  | -1.47316900 | -2.34785100 | 1.35160400  |
| H  | 1.46750600  | -0.00050700 | -1.32053700 |
| C  | 1.45779400  | 3.38718700  | -1.20434000 |
| C  | -0.67172900 | 3.46715600  | 0.72126500  |
| C  | 0.79946400  | -3.27491300 | -1.55129000 |
| C  | -2.04179100 | -2.93123000 | -1.37361100 |
| H  | 2.29256000  | 2.81352100  | -1.63092800 |
| H  | -0.14451400 | 4.33862800  | 1.14287800  |
| H  | 0.60199800  | -4.33322300 | -1.31259000 |
| H  | -2.89010600 | -2.38548100 | -0.93694700 |
| C  | -0.84158100 | 0.56495600  | -2.37670700 |
| O  | -1.31741700 | 0.82769900  | -3.41183500 |
| B  | -2.13874300 | 0.33113300  | 0.14695800  |
| N  | -3.39685200 | 0.59577200  | -0.50534300 |
| C  | -4.53677200 | 0.46091300  | 0.39891700  |
| C  | -3.88560300 | 0.63045500  | 1.78593700  |
| N  | -2.50589300 | 0.18624400  | 1.55558900  |
| H  | -5.01775600 | -0.53817800 | 0.32045700  |
| H  | -4.40603000 | 0.03895700  | 2.55957700  |
| H  | -5.32385700 | 1.21465700  | 0.22159100  |
| H  | -3.93185500 | 1.69536000  | 2.09821500  |
| H  | -1.85355900 | 0.34883700  | 2.31345900  |
| H  | -3.56380400 | 0.52757000  | -1.50048200 |
| H  | -1.22654700 | 2.94041000  | 1.51163200  |
| H  | -1.40339100 | 3.80829300  | -0.02731600 |
| H  | 0.80291900  | 3.71523100  | -2.02624800 |
| H  | 1.83863500  | 4.27335100  | -0.67118200 |
| H  | 0.78707800  | -3.13940000 | -2.64418300 |
| H  | 1.79514400  | -2.97950400 | -1.19160500 |
| H  | -2.10215100 | -2.84439500 | -2.46977000 |
| H  | -2.08983000 | -3.99654400 | -1.09632100 |
| C  | 4.10174900  | -0.33814500 | -1.26990400 |
| O  | 4.00622400  | -1.49357000 | -1.40380200 |
| O  | 4.27165600  | 0.81019100  | -1.12641700 |

Ru(PNP)(CO)HB(NHCH<sub>2</sub>)<sub>2</sub>-CO<sub>2</sub> TS

|    |             |             |             |
|----|-------------|-------------|-------------|
| Ru | -0.02618000 | -0.07501700 | 0.68587300  |
| P  | 0.72865300  | -2.20410400 | 0.15050500  |
| P  | -0.55582600 | 2.18108600  | 0.59393800  |
| N  | 0.65685600  | 0.33620100  | -1.35606500 |
| C  | 1.47006500  | -0.54834100 | -1.99559600 |
| C  | 1.93595000  | -0.30129000 | -3.29058300 |
| C  | 1.59700800  | 0.88997800  | -3.92911700 |
| C  | 0.78280800  | 1.80153500  | -3.26001200 |
| C  | 0.31141400  | 1.49542800  | -1.97998200 |
| H  | 2.58156600  | -1.03441100 | -3.77601100 |
| H  | 1.96535700  | 1.10650800  | -4.93407200 |
| H  | 0.49319900  | 2.74412400  | -3.72643500 |
| C  | 1.91507400  | -1.76907900 | -1.23114400 |
| C  | -0.64729000 | 2.40945800  | -1.26246800 |
| H  | 2.84985000  | -1.50944900 | -0.70339700 |
| H  | 2.12745800  | -2.60962200 | -1.91077000 |
| H  | -0.52227800 | 3.45472500  | -1.58586200 |
| H  | -1.67002900 | 2.08066000  | -1.52149100 |
| H  | 1.63017700  | 0.25127000  | 1.17690900  |
| C  | 1.78156900  | -3.18677800 | 1.30611900  |
| C  | -0.37161700 | -3.50051200 | -0.58382500 |
| C  | 0.63439300  | 3.47553900  | 1.16971900  |
| C  | -2.17114200 | 2.87404200  | 1.16878600  |
| H  | 2.59048600  | -2.53826900 | 1.67006000  |
| H  | 0.20390600  | -4.35872200 | -0.96689200 |
| H  | 0.33568700  | 4.48181800  | 0.83370700  |
| H  | -2.98730300 | 2.22757100  | 0.81661200  |
| C  | -0.61355500 | -0.40606300 | 2.39379300  |
| O  | -1.01646100 | -0.61105200 | 3.47011500  |
| B  | -2.02447800 | -0.50748900 | -0.03447600 |
| N  | -3.19952500 | -0.86748000 | 0.71605500  |
| C  | -4.40309500 | -0.88944800 | -0.11308500 |
| C  | -3.82960600 | -1.06116600 | -1.53360900 |
| N  | -2.48980200 | -0.47125700 | -1.41949800 |
| H  | -4.97572000 | 0.06018200  | -0.04267300 |
| H  | -4.45587100 | -0.56179900 | -2.29315600 |
| H  | -5.09606800 | -1.70722500 | 0.15030600  |
| H  | -3.78586500 | -2.13877500 | -1.79729600 |
| H  | -1.87332300 | -0.61070200 | -2.21115100 |
| H  | -3.30946000 | -0.76241000 | 1.71599900  |
| H  | -0.96079200 | -3.04839100 | -1.39487100 |
| H  | -1.07502000 | -3.84477700 | 0.18956100  |
| H  | 1.16313400  | -3.50218200 | 2.16041000  |
| H  | 2.20329500  | -4.07862500 | 0.81545400  |
| H  | 0.66991800  | 3.45062000  | 2.26951700  |
| H  | 1.64258900  | 3.22986400  | 0.80959800  |
| H  | -2.17753500 | 2.87216700  | 2.26986600  |
| H  | -2.32393700 | 3.90554500  | 0.81286300  |
| C  | 3.29442300  | 0.55166200  | 1.57353700  |
| O  | 3.23934500  | 1.60115600  | 2.12396500  |
| O  | 3.84554100  | -0.41113900 | 1.13365600  |

Ru(PNP)(CO)HB(NHCH<sub>2</sub>)<sub>2</sub>-CO<sub>2</sub> FS

|    |             |             |             |
|----|-------------|-------------|-------------|
| Ru | 0.21058400  | -0.17685000 | -0.69263400 |
| P  | -0.52871400 | -2.28820000 | 0.00545300  |
| P  | 0.59198600  | 2.12066400  | -0.86785600 |
| N  | -1.00200000 | 0.46242100  | 1.01496500  |
| C  | -1.88934000 | -0.39817200 | 1.58629600  |
| C  | -2.70954300 | 0.00506700  | 2.64462900  |
| C  | -2.65397300 | 1.32081200  | 3.09552400  |
| C  | -1.76166000 | 2.20254400  | 2.49024400  |
| C  | -0.93297000 | 1.74613200  | 1.46251100  |
| H  | -3.40802600 | -0.70920900 | 3.08207100  |
| H  | -3.30322400 | 1.65773100  | 3.90630400  |
| H  | -1.69119700 | 3.24112300  | 2.81546300  |
| C  | -2.03027200 | -1.77726100 | 0.99440200  |
| C  | 0.11226700  | 2.65101700  | 0.86032900  |
| H  | -2.83302600 | -1.73085200 | 0.23448500  |
| H  | -2.31690200 | -2.51349700 | 1.76158200  |
| H  | -0.20201200 | 3.70488300  | 0.91134500  |
| H  | 1.03688500  | 2.53765700  | 1.45363000  |
| H  | -1.37152000 | 0.00551000  | -1.77273400 |
| C  | -1.21016600 | -3.49960300 | -1.20125400 |
| C  | 0.47594200  | -3.32495800 | 1.16117600  |
| C  | -0.45295700 | 3.12880400  | -2.00192200 |
| C  | 2.27578300  | 2.85102000  | -1.07496200 |
| H  | -1.92832200 | -2.94881300 | -1.82859400 |
| H  | -0.10648800 | -4.17706100 | 1.54640700  |
| H  | -0.39464300 | 4.20119900  | -1.75545600 |
| H  | 2.97668600  | 2.36077100  | -0.38465900 |
| C  | 1.23296900  | -0.71620400 | -2.12189000 |
| O  | 1.90759200  | -1.05337000 | -3.01005100 |
| B  | 1.94442300  | -0.32717300 | 0.50528500  |
| N  | 3.27568000  | -0.72376600 | 0.13414000  |
| C  | 4.23075800  | -0.50604100 | 1.21989700  |
| C  | 3.32379500  | -0.46687000 | 2.46652900  |
| N  | 2.03670000  | -0.01304600 | 1.92469700  |
| H  | 4.77354600  | 0.45634800  | 1.10829000  |
| H  | 3.72257700  | 0.20677500  | 3.24407200  |
| H  | 4.99054100  | -1.30286900 | 1.29164600  |
| H  | 3.24822800  | -1.48032200 | 2.91260300  |
| H  | 1.24513500  | -0.04937200 | 2.55520800  |
| H  | 3.63143700  | -0.77701700 | -0.81105600 |
| H  | 0.82831700  | -2.70041400 | 1.99490200  |
| H  | 1.36032900  | -3.69756100 | 0.62255100  |
| H  | -0.38779000 | -3.88852500 | -1.82059300 |
| H  | -1.71127100 | -4.33656400 | -0.68930200 |
| H  | -0.09276800 | 2.97214800  | -3.03095000 |
| H  | -1.48750200 | 2.75217100  | -1.93194800 |
| H  | 2.61233300  | 2.66209100  | -2.10601100 |
| H  | 2.26632800  | 3.93774100  | -0.89500700 |
| C  | -2.61526000 | 0.09611400  | -1.75497900 |
| O  | -3.15799900 | -1.00718700 | -1.87471200 |
| O  | -2.99202200 | 1.25962800  | -1.61580000 |

Ru(PNP)(CO)HBpin-CO<sub>2</sub> IS

|    |             |             |             |
|----|-------------|-------------|-------------|
| Ru | -0.50795700 | -0.17578900 | -0.73360700 |
| P  | -0.84531500 | -2.26211200 | 0.20839300  |
| P  | -0.48170600 | 2.10975900  | -1.10062700 |
| N  | -1.08017400 | 0.48752000  | 1.27567300  |
| C  | -1.62593400 | -0.39141000 | 2.15949900  |
| C  | -1.97726900 | -0.00075600 | 3.45481300  |
| C  | -1.80917500 | 1.32693900  | 3.84325400  |
| C  | -1.28589100 | 2.23055200  | 2.92167600  |
| C  | -0.91603400 | 1.78524800  | 1.64865400  |
| H  | -2.40147800 | -0.73660800 | 4.13960600  |
| H  | -2.08854000 | 1.65333000  | 4.84725100  |
| H  | -1.14336400 | 3.28004700  | 3.18328300  |
| C  | -1.91668900 | -1.78857900 | 1.67031100  |
| C  | -0.27729500 | 2.72132300  | 0.65641100  |
| H  | -2.94704200 | -1.79905800 | 1.27281300  |
| H  | -1.87079700 | -2.51582100 | 2.49667400  |
| H  | -0.62366300 | 3.75638200  | 0.80587200  |
| H  | 0.81311900  | 2.68545200  | 0.82138800  |
| H  | -2.19087700 | -0.22047200 | -1.06998600 |
| C  | -1.86351300 | -3.54947300 | -0.64218600 |
| C  | 0.49862000  | -3.29129600 | 0.96618000  |
| C  | -1.98664300 | 2.98481000  | -1.73218700 |
| C  | 0.87182300  | 3.00599800  | -1.98797600 |
| H  | -2.78555000 | -3.07883000 | -1.01018900 |
| H  | 0.09576000  | -4.19901900 | 1.44446700  |
| H  | -1.89866400 | 4.08023900  | -1.64336000 |
| H  | 1.83529500  | 2.67107000  | -1.57925000 |
| C  | -0.04742200 | -0.73124200 | -2.42755200 |
| O  | 0.24538000  | -1.07981400 | -3.50076700 |
| B  | 1.59474400  | -0.14599400 | -0.23157800 |
| O  | 2.26627300  | 0.85099300  | 0.51686600  |
| C  | 3.62129400  | 0.41635800  | 0.81705800  |
| C  | 3.87827200  | -0.65709700 | -0.30223400 |
| O  | 2.53578300  | -1.11907400 | -0.59951500 |
| C  | 4.44822700  | -0.06203300 | -1.59834700 |
| C  | 4.72363800  | -1.85664800 | 0.12556100  |
| C  | 4.54554500  | 1.63291600  | 0.77976200  |
| C  | 3.60426600  | -0.17318500 | 2.23459700  |
| H  | 5.74087000  | -1.54484400 | 0.41517300  |
| H  | 4.27066800  | -2.39599100 | 0.96805600  |
| H  | 4.81334500  | -2.56110200 | -0.71571600 |
| H  | 3.85721100  | 0.80288200  | -1.93400600 |
| H  | 4.39934500  | -0.82511200 | -2.38958000 |
| H  | 5.49790100  | 0.25216100  | -1.48315600 |
| H  | 3.21103200  | 0.58274900  | 2.93163600  |
| H  | 2.95051300  | -1.05611900 | 2.29052200  |
| H  | 4.61154400  | -0.46344000 | 2.57302200  |
| H  | 4.47651800  | 2.16953000  | -0.17595100 |
| H  | 5.59589600  | 1.33770800  | 0.93799100  |
| H  | 4.26953600  | 2.33456100  | 1.58273800  |
| C  | -4.85700500 | -0.24090600 | -0.87668400 |
| O  | -4.93597300 | 0.85494700  | -1.26928100 |
| O  | -4.84720000 | -1.33815400 | -0.47130500 |
| H  | -2.12435500 | 2.71462900  | -2.79085400 |
| H  | -2.86693300 | 2.62421600  | -1.18204800 |
| H  | 0.82912400  | 2.74310400  | -3.05619800 |
| H  | 0.77806000  | 4.09890300  | -1.88190400 |
| H  | 1.21954300  | -3.56703600 | 0.18269400  |
| H  | 1.03395600  | -2.68670400 | 1.71276700  |
| H  | -1.29499100 | -3.93113200 | -1.50430000 |
| H  | -2.10707300 | -4.38863400 | 0.02929800  |

Ru(PNP)(CO)HBpin-CO<sub>2</sub> TS

|    |             |             |             |
|----|-------------|-------------|-------------|
| Ru | -0.58686500 | -0.16572200 | -0.67189100 |
| P  | -0.87714000 | -2.26209100 | 0.29635000  |
| P  | -0.55156200 | 2.13221000  | -1.03140400 |
| N  | -1.11705900 | 0.49573300  | 1.34922700  |
| C  | -1.65592200 | -0.38480900 | 2.23574000  |
| C  | -1.99091500 | 0.00547500  | 3.53560100  |
| C  | -1.81259100 | 1.33167100  | 3.92333300  |
| C  | -1.29367700 | 2.23581200  | 2.99984900  |
| C  | -0.93964800 | 1.79152500  | 1.72220400  |
| H  | -2.41271600 | -0.72874800 | 4.22326300  |
| H  | -2.08154500 | 1.65754700  | 4.93034300  |
| H  | -1.14374400 | 3.28373600  | 3.26312700  |
| C  | -1.95606800 | -1.77890900 | 1.74629000  |
| C  | -0.30394700 | 2.72595300  | 0.72592000  |
| H  | -2.97805900 | -1.77238800 | 1.32784700  |
| H  | -1.92776500 | -2.50671200 | 2.57249000  |
| H  | -0.63579500 | 3.76387100  | 0.88683900  |
| H  | 0.78832300  | 2.67610800  | 0.87307900  |
| H  | -2.32216300 | -0.20810700 | -0.97770200 |
| C  | -1.86879200 | -3.57432100 | -0.54233300 |
| C  | 0.49517700  | -3.24287100 | 1.06075300  |
| C  | -2.05984800 | 3.02551400  | -1.61899800 |
| C  | 0.79393800  | 3.00810400  | -1.94744800 |
| H  | -2.80653900 | -3.12614100 | -0.89790800 |
| H  | 0.10976300  | -4.14563900 | 1.56162500  |
| H  | -1.94108600 | 4.11750100  | -1.52935300 |
| H  | 1.76239800  | 2.65670100  | -1.56565800 |
| C  | -0.15155000 | -0.71931900 | -2.37546700 |
| O  | 0.12605200  | -1.06379800 | -3.45184100 |
| B  | 1.50500900  | -0.14722800 | -0.23778800 |
| O  | 2.19514700  | 0.84464000  | 0.49359700  |
| C  | 3.56053100  | 0.40872500  | 0.74821300  |
| C  | 3.78061900  | -0.66314800 | -0.38156600 |
| O  | 2.42724400  | -1.12081800 | -0.64021800 |
| C  | 4.31282500  | -0.06759800 | -1.69303600 |
| C  | 4.63399800  | -1.86612600 | 0.01884000  |
| C  | 4.48190800  | 1.62599300  | 0.68179600  |
| C  | 3.58957800  | -0.18167700 | 2.16472500  |
| H  | 5.65970900  | -1.55703600 | 0.27922700  |
| H  | 4.20455000  | -2.40574500 | 0.87331900  |
| H  | 4.69750200  | -2.56871100 | -0.82620600 |
| H  | 3.71488000  | 0.79912000  | -2.01143100 |
| H  | 4.24035100  | -0.82963600 | -2.48337000 |
| H  | 5.36575200  | 0.24470400  | -1.60752700 |
| H  | 3.22397400  | 0.57499600  | 2.87575400  |
| H  | 2.93547700  | -1.06250300 | 2.24309000  |
| H  | 4.60691800  | -0.47584600 | 2.46717700  |
| H  | 4.38469200  | 2.16200700  | -0.27172900 |
| H  | 5.53636800  | 1.33103600  | 0.80892500  |
| H  | 4.22977100  | 2.32779200  | 1.49230600  |
| C  | -4.01177700 | -0.30091100 | -1.23096600 |
| O  | -4.20320200 | 0.55165200  | -2.03497100 |
| O  | -4.34582100 | -1.18321200 | -0.49802700 |
| H  | 0.71784300  | 2.75278500  | -3.01557700 |
| H  | 0.71937400  | 4.10139000  | -1.83263300 |
| H  | -1.29715900 | -3.94825300 | -1.40557500 |
| H  | -2.08677000 | -4.41280800 | 0.13843800  |
| H  | 1.21232600  | -3.52514700 | 0.27650700  |
| H  | 1.02517600  | -2.61424900 | 1.79106500  |
| H  | -2.24157100 | 2.75770000  | -2.67058500 |
| H  | -2.93168500 | 2.68445500  | -1.04482900 |

Ru(PNP)(CO)HBpin-CO<sub>2</sub> FS

|    |             |             |             |
|----|-------------|-------------|-------------|
| Ru | -0.49714700 | -0.19489100 | -0.77102500 |
| P  | -0.80032300 | -2.31807000 | 0.17914400  |
| P  | -0.49013700 | 2.11816000  | -1.16114600 |
| N  | -1.28494700 | 0.44529200  | 1.16359100  |
| C  | -1.88370900 | -0.45657700 | 1.99018300  |
| C  | -2.42651900 | -0.06503200 | 3.21725500  |
| C  | -2.40003400 | 1.27743300  | 3.58427300  |
| C  | -1.81689400 | 2.19901000  | 2.71885600  |
| C  | -1.25238800 | 1.75766000  | 1.51944400  |
| H  | -2.89515800 | -0.81330600 | 3.85742700  |
| H  | -2.83774500 | 1.60338200  | 4.53011200  |
| H  | -1.78487400 | 3.26031600  | 2.96780200  |
| C  | -2.03268900 | -1.88093500 | 1.51455500  |
| C  | -0.54514900 | 2.72626400  | 0.60621300  |
| H  | -3.01330500 | -1.96484100 | 1.01053200  |
| H  | -2.01639200 | -2.58565000 | 2.36057000  |
| H  | -0.97760300 | 3.73496100  | 0.69336900  |
| H  | 0.51310200  | 2.77068700  | 0.91463700  |
| H  | -2.33383100 | -0.25266900 | -1.36672000 |
| C  | -1.64558100 | -3.63483500 | -0.79093700 |
| C  | 0.53725700  | -3.22805600 | 1.07246000  |
| C  | -1.93512100 | 2.89092000  | -2.00159100 |
| C  | 0.94990700  | 3.03317800  | -1.86769400 |
| H  | -2.55304800 | -3.18165400 | -1.21942100 |
| H  | 0.14110200  | -4.15145500 | 1.52411800  |
| H  | -1.95874800 | 3.97923000  | -1.83082700 |
| H  | 1.86040300  | 2.73407300  | -1.33104400 |
| C  | 0.14183700  | -0.75646200 | -2.41046600 |
| O  | 0.54660500  | -1.10899500 | -3.44059500 |
| B  | 1.48957900  | -0.11982200 | -0.15362600 |
| O  | 2.05313600  | 0.90709300  | 0.62436700  |
| C  | 3.39937200  | 0.52314800  | 1.03086400  |
| C  | 3.77528000  | -0.56058900 | -0.04872600 |
| O  | 2.47135600  | -1.06879000 | -0.44260200 |
| C  | 4.42463900  | 0.02968000  | -1.30765300 |
| C  | 4.61788600  | -1.72521700 | 0.46825100  |
| C  | 4.28341000  | 1.76903100  | 1.03563400  |
| C  | 3.29542500  | -0.04112900 | 2.45378800  |
| H  | 5.59365000  | -1.37183500 | 0.83952800  |
| H  | 4.11345700  | -2.26903400 | 1.27786000  |
| H  | 4.80608000  | -2.43692000 | -0.35016000 |
| H  | 3.84013000  | 0.87359500  | -1.70284300 |
| H  | 4.45824900  | -0.74668800 | -2.08639100 |
| H  | 5.45313800  | 0.37386400  | -1.11701600 |
| H  | 2.83045900  | 0.71403400  | 3.10567800  |
| H  | 2.66803700  | -0.94403500 | 2.48191400  |
| H  | 4.28383800  | -0.29226100 | 2.86871000  |
| H  | 4.26877400  | 2.28712600  | 0.06752700  |
| H  | 5.32754900  | 1.50863800  | 1.27347300  |
| H  | 3.93038600  | 2.47421400  | 1.80422700  |
| C  | -3.54299200 | -0.29120700 | -1.04362200 |
| O  | -4.00123300 | 0.83108200  | -0.83461900 |
| O  | -3.96737900 | -1.44920500 | -1.00554000 |
| H  | -1.85070900 | 2.69440100  | -3.08214200 |
| H  | -2.84967500 | 2.40202000  | -1.62540700 |
| H  | 1.05349700  | 2.76335900  | -2.92980400 |
| H  | 0.80720900  | 4.12271700  | -1.78759100 |
| H  | 0.95584500  | -2.58485000 | 1.85990100  |
| H  | 1.34294500  | -3.46926200 | 0.36502500  |
| H  | -0.97222100 | -3.96901200 | -1.59495300 |
| H  | -1.90992300 | -4.49439800 | -0.15457100 |

Ru(PNP)(CO)HBcat-CO<sub>2</sub> IS

|    |             |             |             |
|----|-------------|-------------|-------------|
| Ru | -0.53163400 | -0.27201400 | -0.74888500 |
| P  | -0.58633400 | 1.95666900  | -1.37712500 |
| P  | -0.73533500 | -2.24333600 | 0.44917300  |
| N  | -0.98021500 | 0.60620300  | 1.20923000  |
| C  | -0.82815900 | 1.94136900  | 1.41738300  |
| C  | -1.12207100 | 2.52463600  | 2.65368500  |
| C  | -1.55140500 | 1.72338500  | 3.70857800  |
| C  | -1.70244800 | 0.35561600  | 3.49036800  |
| C  | -1.43040200 | -0.17640900 | 2.22677300  |
| H  | -0.99331400 | 3.60023700  | 2.78216000  |
| H  | -1.76977200 | 2.15882100  | 4.68590300  |
| H  | -2.05079000 | -0.30471000 | 4.28583200  |
| C  | -0.28395900 | 2.77025900  | 0.28239800  |
| C  | -1.70412000 | -1.63023500 | 1.92900300  |
| H  | 0.81469500  | 2.79021700  | 0.38360200  |
| H  | -0.65445300 | 3.80628200  | 0.33390700  |
| H  | -1.56312900 | -2.25191600 | 2.82750800  |
| H  | -2.76182500 | -1.71966800 | 1.62455400  |
| C  | 0.68572100  | 2.75517800  | -2.45621700 |
| C  | -2.14981100 | 2.72890200  | -1.99740300 |
| C  | 0.71609500  | -3.12194900 | 1.19295100  |
| C  | -1.76582000 | -3.64886500 | -0.16439300 |
| H  | 1.68684600  | 2.47807200  | -2.09658600 |
| H  | -2.08369400 | 3.82875500  | -2.03350000 |
| H  | 0.40430800  | -3.96772300 | 1.82690500  |
| H  | -2.73291500 | -3.25098400 | -0.50190600 |
| C  | -0.20385900 | -1.01489300 | -2.40486800 |
| O  | -0.00705800 | -1.48509400 | -3.45151600 |
| H  | -2.22747900 | -0.39789900 | -0.95778600 |
| C  | 3.78527800  | -0.61727700 | -0.31541700 |
| C  | 3.56989800  | 0.49076800  | 0.51019800  |
| C  | 5.05162000  | -1.15529800 | -0.49759800 |
| C  | 4.60918000  | 1.10950600  | 1.19026800  |
| C  | 6.11315900  | -0.53676100 | 0.18646300  |
| H  | 5.20855100  | -2.01857800 | -1.14636800 |
| C  | 5.89702600  | 0.57240800  | 1.01338600  |
| H  | 4.42983700  | 1.97309000  | 1.83328100  |
| H  | 7.12520600  | -0.93029400 | 0.06856900  |
| H  | 6.74252000  | 1.03084300  | 1.53105700  |
| B  | 1.56876900  | -0.14762800 | -0.36039500 |
| O  | 2.23146500  | 0.80155700  | 0.49911800  |
| O  | 2.59016300  | -1.01918300 | -0.85213500 |
| C  | -4.85427200 | -0.33807400 | -0.37360600 |
| O  | -4.80340500 | -1.42623000 | 0.05178500  |
| O  | -4.96570800 | 0.75119800  | -0.77675500 |
| H  | 0.58271100  | 3.85214600  | -2.46884000 |
| H  | -2.34883900 | 2.34196200  | -3.00898000 |
| H  | -2.98212900 | 2.41501000  | -1.35212100 |
| H  | 1.30119500  | -2.40631800 | 1.78945000  |
| H  | 1.36163000  | -3.48519900 | 0.37937100  |
| H  | -1.92048900 | -4.41483400 | 0.61247200  |
| H  | -1.25511800 | -4.10711900 | -1.02526400 |
| H  | 0.56748400  | 2.37157800  | -3.48133500 |

Ru(PNP)(CO)HBcat-CO<sub>2</sub> TS

|    |             |             |             |
|----|-------------|-------------|-------------|
| Ru | -0.60542800 | -0.26325300 | -0.74031200 |
| P  | -0.53703800 | 1.98085600  | -1.34193900 |
| P  | -0.80779000 | -2.25547100 | 0.44993400  |
| N  | -1.05334500 | 0.59058600  | 1.22385200  |
| C  | -0.88415300 | 1.91984800  | 1.45062500  |
| C  | -1.20221000 | 2.49454500  | 2.68447000  |
| C  | -1.67058500 | 1.68801600  | 3.71814400  |
| C  | -1.82970900 | 0.32428300  | 3.48413600  |
| C  | -1.53287500 | -0.19877600 | 2.22269100  |
| H  | -1.06368600 | 3.56686400  | 2.82816800  |
| H  | -1.91169800 | 2.11686700  | 4.69296600  |
| H  | -2.20534200 | -0.33912600 | 4.26422400  |
| C  | -0.28851800 | 2.75611600  | 0.34566500  |
| C  | -1.80702100 | -1.65006300 | 1.91049800  |
| H  | 0.80516000  | 2.77766400  | 0.49475600  |
| H  | -0.65346900 | 3.79390800  | 0.39630700  |
| H  | -1.68429900 | -2.27732800 | 2.80758200  |
| H  | -2.85686500 | -1.73928000 | 1.58056100  |
| C  | 0.83705500  | 2.71389700  | -2.33812900 |
| C  | -2.01637100 | 2.83330300  | -2.04683900 |
| C  | 0.66146000  | -3.08113800 | 1.21345400  |
| C  | -1.79511100 | -3.67576600 | -0.18852800 |
| H  | 1.80496100  | 2.37688600  | -1.94047600 |
| H  | -1.89853500 | 3.92884600  | -2.02892700 |
| H  | 0.36490700  | -3.91081000 | 1.87513900  |
| H  | -2.75884600 | -3.28929000 | -0.54812800 |
| C  | -0.27001800 | -0.99057200 | -2.40417200 |
| O  | -0.06931800 | -1.44967400 | -3.45281000 |
| H  | -2.35622700 | -0.33045700 | -0.96979900 |
| C  | 3.70475300  | -0.40557600 | -0.47852800 |
| C  | 3.41366100  | 0.21551700  | 0.74002800  |
| C  | 5.00852700  | -0.68620400 | -0.86209000 |
| C  | 4.41190800  | 0.58491500  | 1.63022100  |
| C  | 6.02901300  | -0.31636500 | 0.03170100  |
| H  | 5.22344200  | -1.17105200 | -1.81564600 |
| C  | 5.73742200  | 0.30606100  | 1.25191600  |
| H  | 4.17361800  | 1.06856900  | 2.57916800  |
| H  | 7.06899000  | -0.51921500 | -0.23303600 |
| H  | 6.55320000  | 0.58084000  | 1.92407300  |
| B  | 1.46097400  | -0.17856900 | -0.34049000 |
| O  | 2.05135700  | 0.36658800  | 0.85076600  |
| O  | 2.53380600  | -0.65177500 | -1.15001100 |
| C  | -4.02192500 | -0.28198600 | -0.61308500 |
| O  | -4.27382400 | 0.88131400  | -0.62777400 |
| O  | -4.30004700 | -1.43309700 | -0.46965900 |
| H  | -2.14046600 | 2.49874600  | -3.08881600 |
| H  | -2.90846500 | 2.52474200  | -1.48503500 |
| H  | 0.79383100  | 3.81481400  | -2.33805000 |
| H  | 0.74763800  | 2.35192900  | -3.37396200 |
| H  | -1.25106800 | -4.12843100 | -1.03162300 |
| H  | -1.95628400 | -4.43892600 | 0.58954900  |
| H  | 1.30696300  | -3.46766200 | 0.40988000  |
| H  | 1.23471700  | -2.33514800 | 1.78324400  |

Ru(PNP)(CO)HBcat-CO<sub>2</sub> FS

|    |             |             |             |
|----|-------------|-------------|-------------|
| Ru | -0.58073000 | -0.26546600 | -0.75349500 |
| P  | -0.54212100 | 1.99500700  | -1.35310700 |
| P  | -0.78340700 | -2.28109400 | 0.43586600  |
| N  | -1.12314300 | 0.56867100  | 1.19185200  |
| C  | -1.01235600 | 1.90437500  | 1.42021700  |
| C  | -1.40842900 | 2.47049300  | 2.63400500  |
| C  | -1.89574800 | 1.64967700  | 3.64750100  |
| C  | -1.99358700 | 0.28110600  | 3.41431500  |
| C  | -1.62105500 | -0.23611100 | 2.17043000  |
| H  | -1.31826800 | 3.54763200  | 2.77862900  |
| H  | -2.20061100 | 2.07290500  | 4.60678500  |
| H  | -2.38501100 | -0.39210100 | 4.17773300  |
| C  | -0.39255200 | 2.76282600  | 0.34575600  |
| C  | -1.84282400 | -1.69443200 | 1.85635000  |
| H  | 0.69192000  | 2.82029200  | 0.54447300  |
| H  | -0.79467900 | 3.78707300  | 0.38062400  |
| H  | -1.73688000 | -2.31677600 | 2.75848000  |
| H  | -2.87488600 | -1.80278100 | 1.47470600  |
| C  | 0.85402600  | 2.76334200  | -2.28643300 |
| C  | -2.03703200 | 2.75309500  | -2.11565900 |
| C  | 0.69322500  | -3.06029000 | 1.22735900  |
| C  | -1.72586600 | -3.69939000 | -0.26026000 |
| H  | 1.81319800  | 2.47175600  | -1.83463100 |
| H  | -2.01347700 | 3.85160500  | -2.03460900 |
| H  | 0.40051300  | -3.90075800 | 1.87642400  |
| H  | -2.68411100 | -3.29729200 | -0.62327200 |
| C  | -0.15521300 | -0.98985300 | -2.40267400 |
| O  | 0.10258900  | -1.44688400 | -3.43701400 |
| H  | -2.44147200 | -0.33666000 | -1.13762400 |
| C  | 3.66935200  | -0.39433500 | -0.39011700 |
| C  | 3.34800700  | 0.28785800  | 0.78689600  |
| C  | 4.98163000  | -0.69068600 | -0.72882000 |
| C  | 4.32286800  | 0.70596200  | 1.68094300  |
| C  | 5.97902200  | -0.27197800 | 0.16913400  |
| H  | 5.22002600  | -1.22321600 | -1.65068300 |
| C  | 5.65707000  | 0.41162000  | 1.34839600  |
| H  | 4.06117400  | 1.23698900  | 2.59767300  |
| H  | 7.02534600  | -0.48493700 | -0.05965800 |
| H  | 6.45603500  | 0.72312500  | 2.02450600  |
| B  | 1.42957000  | -0.16711500 | -0.31469300 |
| O  | 1.98120900  | 0.44085300  | 0.85753000  |
| O  | 2.51365700  | -0.67984000 | -1.07606600 |
| C  | -3.62868000 | -0.31616700 | -0.69885000 |
| O  | -4.03724400 | -1.45304600 | -0.46043800 |
| O  | -4.05719000 | 0.83097500  | -0.62019400 |
| H  | -1.15604400 | -4.12946400 | -1.09781000 |
| H  | -1.89933800 | -4.47621800 | 0.50134200  |
| H  | 1.36916500  | -3.42577400 | 0.43946100  |
| H  | 1.23001800  | -2.30379300 | 1.81836300  |
| H  | -2.06268400 | 2.46732200  | -3.17907300 |
| H  | -2.92542400 | 2.32897500  | -1.61821400 |
| H  | 0.76780500  | 3.86144300  | -2.30118800 |
| H  | 0.83157700  | 2.38820600  | -3.32100600 |
